# Supplementary material for: Chronic Hypoxia Impairs Muscle Function in the Drosophila Model of Duchenne's Muscular Dystrophy (DMD)
Source: PubMed Central journal article supplement (PMC2958114; doi:10.1371/journal.pone.0013450), 2010-10-20
Supplement: pone.0013450.s001.pdf [file pone.0013450.s001.pdf]

Table S1. Expedition log book for Mount Denali / McKinley Hypoxia Research Expedition. Information obtained during the ascent and summit of Denali, June 1<sup>st</sup> to June 16<sup>th</sup> of 2007. The oxygen pressure (PO<sub>2</sub>) was calculated from the barometric pressure. Load Ferry (LF) refers to a climb with loads to the specified highpoint and return to the starting point. The time of exposure is indicated in brackets.

| DAY | LOCATION             | ALTITUDE<br>(m)  | PO <sub>2</sub><br>mmHg (%) |
|-----|----------------------|------------------|-----------------------------|
| 1   | Base Camp            | 2200             | 123.6 (16.3%)               |
| 2   | Base Camp            | 2200             | 123.6 (16.3%)               |
| 3   | Base Camp            | 2200             | 123.6 (16.3%)               |
| 4   | Ski Hill             | 2400             | 120.7 (15.9%)               |
| 5   | Kahiltna Pass        | 2950             | 113.0 (14.9%)               |
| 6   | Motorcycle Hill      | 3350             | 107.7 (14.2%)               |
| 7   | Motorcycle Hill      | 3350             | 107.7 (14.2%)               |
| 8   | LF from Motorcycle   | 4150 (5 hours)   | 97.7 (12.9%)                |
| 9   | Medical Camp         | 4350             | 95.3 (12.5%)                |
| 10  | LF from Medical Camp | 4150 (5 hours)   | 97.7 (12.9%)                |
| 11  | Medical Camp         | 4350             | 95.3 (12.5%)                |
| 12  | LF from Medical Camp | 4900             | 89.0 (11.7%)                |
| 13  | Medical Camp         | 4350             | 95.3 (12.5%)                |
| 14  | High Camp            | 5250             | 85.1 (11.2%)                |
| 15  | Summit               | 6194 (0.3 hours) | 75.4 (9.9%)                 |
| 16  | High Camp            | 5250             | 85.1 (11.2%)                |
