# Supplementary material for: Chronic Hypoxia Impairs Muscle Function in the Drosophila Model of Duchenne's Muscular Dystrophy (DMD)
Source: PubMed Central journal article supplement (PMC2958114; doi:10.1371/journal.pone.0013450), 2010-10-20
Supplement: pone.0013450.s002.pdf [file pone.0013450.s002.pdf]

Table S2. List of genes used for microarray validation. Name, catalog number from Applied Biosystems® and REFSEQ from each gene used on validation of microarray study. The last gene is the housekeeping gene used.

| NAME                        | TAQMAN GENE<br>EXPRESSION ASSAY ID | REFSEQ      |
|-----------------------------|------------------------------------|-------------|
| CG10531                     | Dm01827770_g1                      | NM_137699.3 |
| CG13311                     | Dm02367367_s1                      | NM_140001.2 |
| lysosome X                  | Dm01821925_s1                      | NM_079157.1 |
| jonah 44E                   | Dm01812211_s1                      | NM_165618.1 |
| CG12057                     | Dm01837328_s1                      | NM_132306.2 |
| juvenile hormone esterase   | Dm01821470_g1                      | NM_079034.2 |
| CG15369                     | Dm018352_g1                        | NM_132314.1 |
| odorant binding protein 99b | Dm02146202_s1                      | NM_143456.1 |
| CG7738                      | Dm01819533_s1                      | NM_136809.3 |
| hormone receptor-like in 38 | Dm01842600_m1                      | NM_057771.2 |
| ribosome protein like 11    | Dm01842483-g1                      | NM_025919.5 |
