# Supplementary material for: Chronic Hypoxia Impairs Muscle Function in the Drosophila Model of Duchenne's Muscular Dystrophy (DMD)
Source: PubMed Central journal article supplement (PMC2958114; doi:10.1371/journal.pone.0013450), 2010-10-20
Supplement: pone.0013450.s004.pdf [file pone.0013450.s004.pdf]

Table S4. List of top 10 differentially expressed genes detected in *dmDys* exposed to CH profiling. Affy ID, name, FlyBase ID and fold change is shown for each gene.

| Affy ID                     | NAME                     | FlyBase ID   | FOLD CHANGE |
|-----------------------------|--------------------------|--------------|-------------|
| 1635270_at                  | CG14499-PA               | FBgn0034317  | 708.34      |
| 1632720_at                  | lyzosome X               | FBgn0004431  | 494.87      |
| 1634064_at                  | CG13311-PA               | FBgn0035929  | 249.54      |
| 1630600_at                  | frost                    | FBgn0037724  | 168.94      |
| 1623027_s_at                | CG6277-PA                | FBgn0039475  | 159.84      |
| 1631446_at                  | chitinase 9              | FBgn0034582  | 146.66      |
| AFFX-r2-Dros-<br>Act5C-5_at | actin 5C                 | FBgn0000042  | 124.77      |
| 1633749_at                  | CG6337                   | FBgn 0033873 | 124.15      |
| 1626386_at                  | cuticular protein 57A    | FBgn0034517  | 115.12      |
| 1628541_at                  | tak-1 like 1             | FBgn0046689  | 113.17      |
| 1624543_s_at                | SD01615P                 | FBgn0029744  | -253.68     |
| 1628617_at                  | drosomycin-4             | FBgn0052282  | -266.95     |
| 1637055_s_at                | gtwin                    | FBte0001062  | -297.44     |
| 1633617_at                  | CG15116-PA               | FBgn0034415  | -323.10     |
| 1639364_at                  | jonah 44E                | FBgn0001285  | -336.59     |
| 1634076_at                  | LP05863P                 | FBgn0030098  | -624.61     |
| 1632841_x_at                | heat shock protein 70Ba  | FBgn001327   | -836.12     |
| 1639571_s_at                | heat shock protein 70BBB | FBgn0051354  | -2132.20    |
| 1626821_s_at                | heat shock protein 70AB  | FBgn0013276  | -2570.69    |

1635878\_s\_at

CG17571-PA.3

FBgn0032947

-2923.00

---
