# Supplementary material for: Chronic Hypoxia Impairs Muscle Function in the Drosophila Model of Duchenne's Muscular Dystrophy (DMD)
Source: PubMed Central journal article supplement (PMC2958114; doi:10.1371/journal.pone.0013450), 2010-10-20
Supplement: pone.0013450.s010.pdf [file pone.0013450.s010.pdf]

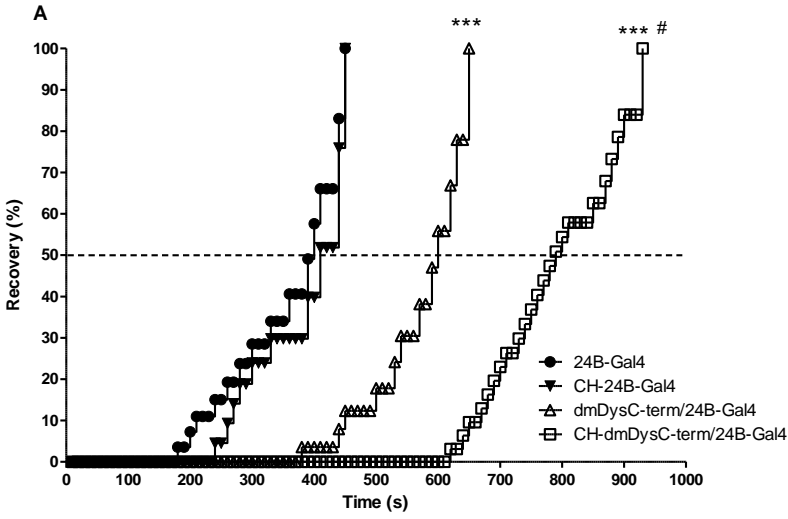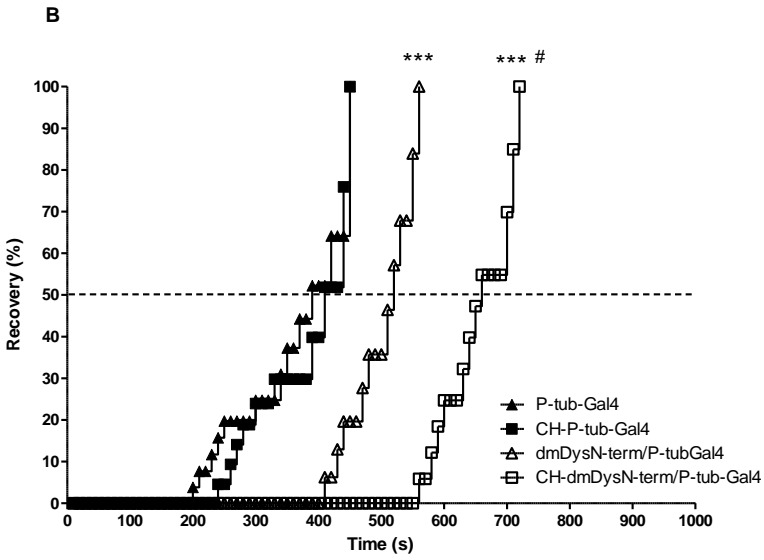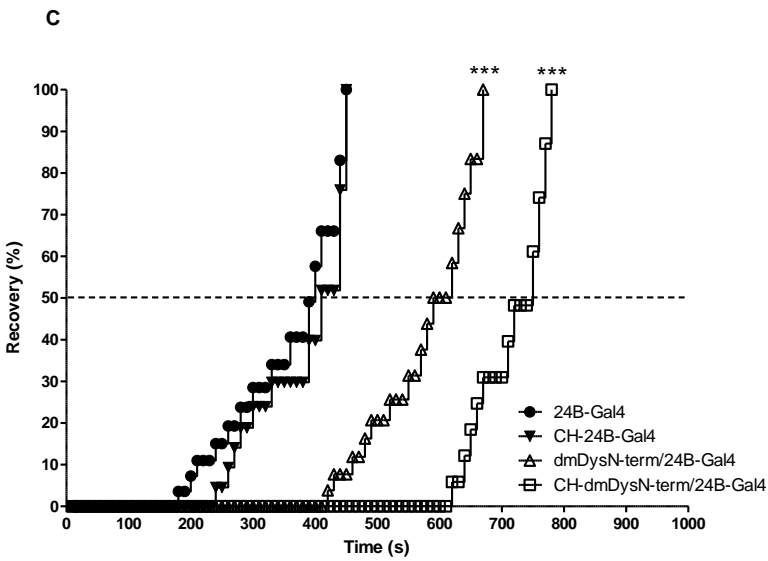

**Figure S1. Time of recovery from severe hypoxic challenge assay.** The *dmDysC-term* and *dmDysN-term* driven by either *P-tub-Gal4* or *24B-Gal4* were exposed either to normoxia (triangle) or CH (square) following the hypoxia protocol. Then, the flies were exposed for 2 hours under 1% FiO<sub>2</sub> and then to room air. The starting time was considered as the moment when the normoxia was reestablished and a complete recovery was considered when the fly climbed the vial. The driver *P-tub-Gal4* or *24B-Gal4* was used as control. Five vials from each genotype were used containing 20 flies per vial. The dotted line shows the median recovery time of the assay. \*\*\*  $p < 0.001$  *dmDys* vs. drivers. #  $p < 0.05$  from *CH-dmDys* vs normoxic *dmDys*.
