# Supplementary material for: Chronic Hypoxia Impairs Muscle Function in the Drosophila Model of Duchenne's Muscular Dystrophy (DMD)
Source: PubMed Central journal article supplement (PMC2958114; doi:10.1371/journal.pone.0013450), 2010-10-20
Supplement: pone.0013450.s011.pdf [file pone.0013450.s011.pdf]

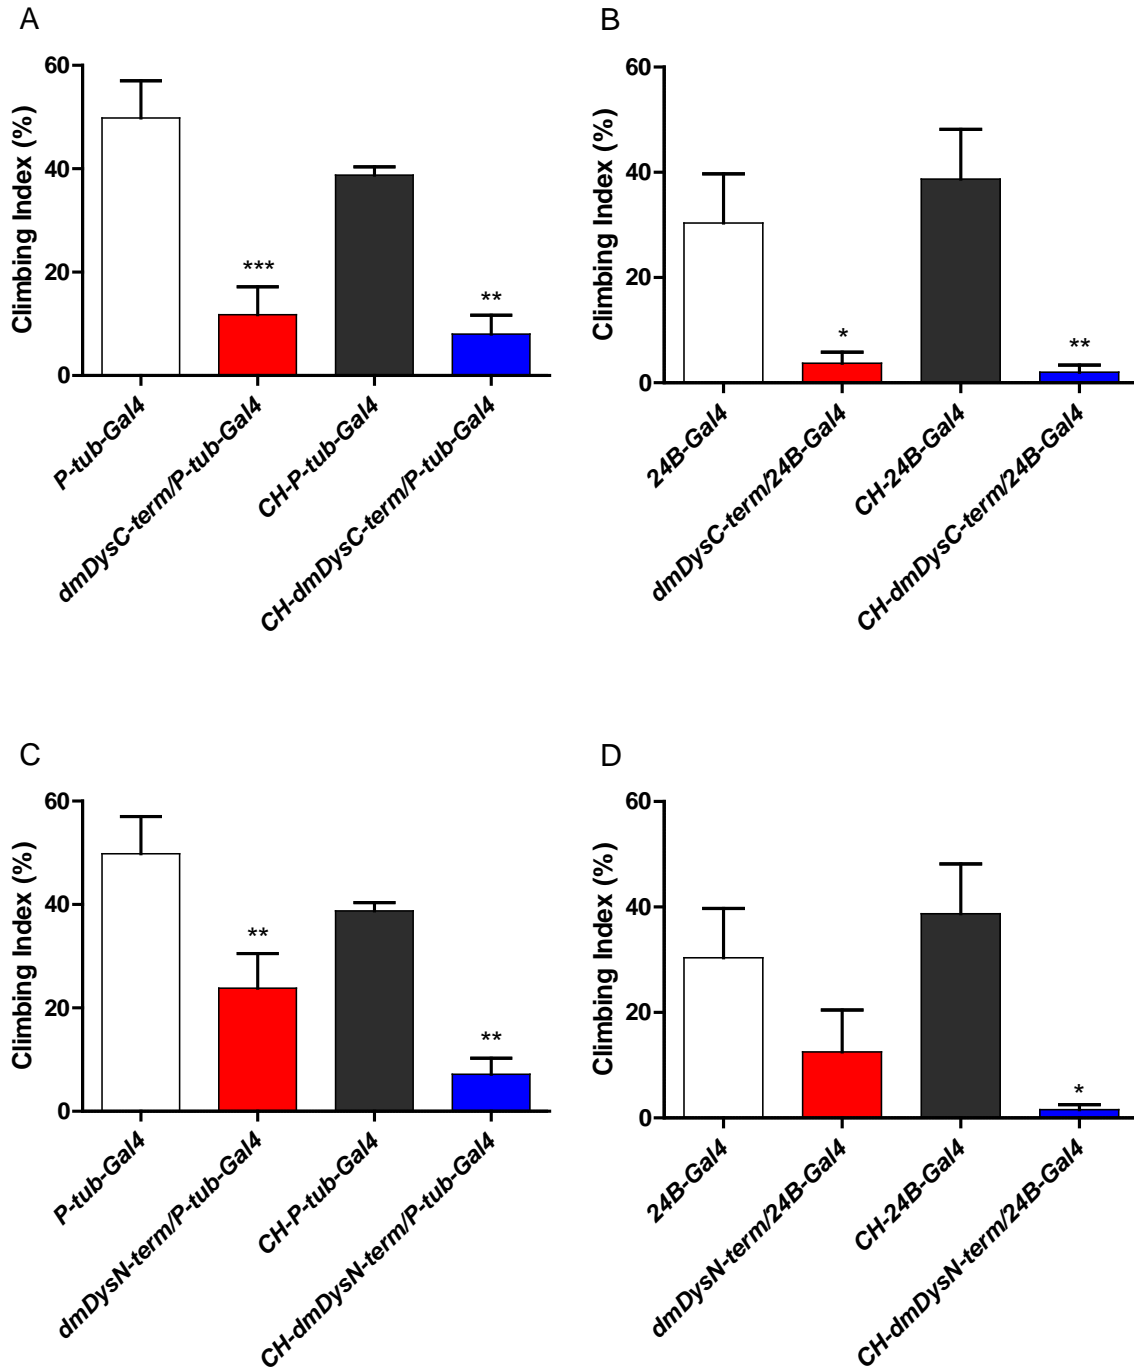

**Figure S2. Climbing index of *dmDys* exposed to CH.** The *dmDysC-term* and *dmDysN-term* driven by either *P-tub-Gal4* or *24B-Gal4* were exposed either to normoxia (red) or CH (blue) following the hypoxia protocol. Five vials from each genotype

containing 20 flies in each vial were used. *DmDysC-term* mutation was driven by driven by tubulin (A) or muscle-specific driver (B), and *dmDysN-term* driven by tubulin (D) or muscle-specific (E). The driver *P-tub-Gal4* or *24B-Gal4* was used as control. The starting time was considered as the moment when the normoxia was reestablished and a complete recovery was considered when the fly climbed the vial. Mean  $\pm$  SEM, n = 100; \* p < 0.05; \*\* p < 0.01; \*\*\* p < 0.001 *dmDys* vs. WT under the same condition.
